# Supplementary material
Source: publisher figshare collection journal article supplement (https://gsajournals.figshare.com/ndownloader/files/26770709)
Supplement: Supplementary file 1 [file 26770709]

## Sheet: Sheet1
Table S4. Relevant plasmids.
Plasmids	Description
MGP007	SNO1 ORF with regulatory sequence (chrXIII:457089..458922), chrIV homology sequence (chrIV:421463..422832), nourseothricin acetyltransferase (NrsR)
MGP008	CTF13 ORF with regulatory sequence (chrXIII:454955..457563), chrIV homology sequence (chrIV:421463..422832), nourseothricin acetyltransferase (NrsR)
MGP009	SNO1 ORF (chrXIII:457285..457959)-TADH1 (chrXV:159382..159547), aminoglycoside phosphotransferase (KanR)
MGP010	As MG009, SNO1 ORF (chrXIII:457285..457959), nonsense point mutation C84X via site-directed mutagenesis (Primers MRG491+MRG492)
MGP012	CTF13 ORF with regulatory sequence (chrXIII:454955..457563) from MGP008 cloned into the MCS of pRS315 using HindIII-HF (use to maintain expression of CTF13 on a centromeric plasmid while generating endogenous ctf13∆::URA3)
MGP014	As MG012, 3xHA N-terminal tagged CTF13
MGP026	pFA6-KanMX6-TADH1 (chrXV:159382..159547)
